# Supplementary material
Source: PubMed Central journal article supplement (PMC3918517)
Supplement: NIHMS538530-supplement-Appendix.pdf [file NIHMS538530-supplement-Appendix.pdf]

## Web extra material

|                                                                                        | Countries   | Total number of participants (n) | N with clinical follow-up | Ethnic origins (n, %)                                                                                 | Endpoints                          | Age at baseline (years) | Men (%) <sup>&amp;</sup>  | Time between first and second ultrasound scan (mean, years) | Clinical follow-up after ultrasound scan 2 (mean, years) | Segments | Measurements         | Intima media thickness definition |
|----------------------------------------------------------------------------------------|-------------|----------------------------------|---------------------------|-------------------------------------------------------------------------------------------------------|------------------------------------|-------------------------|---------------------------|-------------------------------------------------------------|----------------------------------------------------------|----------|----------------------|-----------------------------------|
| Atherosclerosis Risk of Rural Areas in Korea General Population (ARIRANG) <sup>1</sup> | Korea       | 5,020                            | unknown                   | Asian                                                                                                 | MI, stroke, death                  | 40-70                   | 693 of 1,795 (40.4)       | 3-0                                                         | 3-0                                                      | CCA      | Far wall             | Mean                              |
| Carotid-Femoral morphology and cardiovascular events (CAFES-CAVE) <sup>2</sup>         | Italy       | 13,221                           | 10,000                    | White                                                                                                 | MI, stroke, death, vascular death  | 35-65                   | 6,055 <sup>§</sup> (60.6) | 2-0                                                         | 8-0                                                      | BIF      | Far wall, left+right | Maximal categories                |
| Chin-Shan Community Cardiovascular Cohort Study (CCCC) <sup>3</sup>                    | Taiwan      | 3,602                            | 3,602                     | Asian (3602, 100.0%)*                                                                                 | MI, stroke, vascular death, death  | >35                     | 1,702 (47.3)              | 5-0                                                         | 5-0                                                      | CCA      | Far wall, left+right | max                               |
| Perth Carotid Ultrasound Disease Assessment Study (CUDAS) <sup>4</sup>                 | Australia   | 1,111                            | 779*                      | White                                                                                                 | MI, CVD                            | 27-77                   | 558 (50.2)                | 3-0*                                                        | 7-0*                                                     | CCA      | Far wall, left+right | mean                              |
| Hoorn Study <sup>5</sup>                                                               | Netherlands | 581                              | 400*                      | White (581, 100.0%)                                                                                   | MI, stroke, death, vascular death* | 50-75                   | 285 (49.0)                | 5-0                                                         | 5-0                                                      | CCA      | Far wall, right      | mean                              |
| Multi-Ethnic Study of Atherosclerosis (MESA) <sup>6</sup>                              | USA         | 6,814                            | 5,028                     | White (1986, 39.5%)<br>African American (1292, 25.7%)<br>Hispanic (1106, 22.0%)<br>Asian (644, 12.8%) | MI, stroke, vascular death, death  | 45-84                   | 2,411 (48.0)              | 2.6                                                         | 3.2                                                      | CCA, ICA | Far wall, left+right | mean, max                         |

CCA=common carotid artery; BIF=bifurcation of carotid artery; ICA=internal carotid artery; <sup>&</sup>total sample; <sup>§</sup>only those with clinical follow up; \*personal communication

References for this table:

1. Youn YJ, Lee NS, Kim JY, Lee JW, Sung JK et al. Normative Values and Correlates of Mean Common Carotid Intima-Media Thickness in the Korean Rural Middle-aged Population: The Atherosclerosis Risk of Rural Areas in Korea General Population (ARIRANG) Study. J Korean Med Sci 2011 ;26: 365–371.
2. Belcaro G, Nicolaidis AN, Ramaswami G, Cesarone MR, Sanctis M de et al. Carotid and femoral ultrasound morphology screening and cardiovascular events in low risk subjects: a 10-year follow-up study (the CAFES-CAVE study). Atherosclerosis 2001 ;156: 379–387.
3. Chien K, Su T, Jeng J, Hsu H, Chang W et al. Carotid artery intima-media thickness, carotid plaque and coronary heart disease and stroke in Chinese. PLoS ONE 2008 ;3: e3435.
4. Chapman CM, Palmer LJ, McQuillan BM, Hung J, Burley J et al. Polymorphisms in the angiotensinogen gene are associated with carotid intimal-medial thickening in females from a community-based population. Atherosclerosis 2001 ;159: 209–217.
5. Van d, Biessels G, Stehouwer C, Kappelle L, Heine R et al. Ten-year time course of risk factors for increased carotid intima-media thickness: the Hoorn Study. Eur J Cardiovasc Prev Rehabil 2010 ;17: 168–174.
6. Polak JF, Pencina MJ, O'Leary DH, D'Agostino RB. Common carotid artery intima-media thickness progression as a predictor of stroke in multi-ethnic study of atherosclerosis. Stroke. 2011; 42: 3017-21.

**Webtable A1: Description of eligible studies not included**

| Cohort                                                                               | N total | N excluded* due to ..                      |                                 |                               | N after exclusion* |
|--------------------------------------------------------------------------------------|---------|--------------------------------------------|---------------------------------|-------------------------------|--------------------|
|                                                                                      |         | .. event before 2 <sup>nd</sup> ultrasound | .. lost to ultrasound follow-up | .. lost to clinical follow-up |                    |
| Atherosclerosis and Insulin Resistance study                                         | 391     | 91                                         | 52                              | 40                            | 297                |
| Atherosclerosis Risk In Communities                                                  | 14,289  | 1,229                                      | 940                             | 0                             | 12,221             |
| Bogalusa Heart Study                                                                 | 1,399   | 29                                         | 596                             | 229                           | 558                |
| Bruneck study                                                                        | 821     | 82                                         | 145                             | 0                             | 633                |
| Carotid Atherosclerosis Progression Study                                            | 6,972   | 280                                        | 3,549                           | 0                             | 3,284              |
| Cardiovascular Health Study, cohort 1                                                | 5,201   | 908                                        | 1,048                           | 0                             | 3,551              |
| Cardiovascular Health Study, cohort 2                                                | 687     | 140                                        | 336                             | 0                             | 297                |
| Edinburgh Artery Study                                                               | 1,605   | 138                                        | 899                             | 0                             | 613                |
| Etude sur le vieillissement artériel                                                 | 1,040   | 101                                        | 12                              | 7                             | 922                |
| Interventionsprojekt zerebrovaskuläre Erkrankungen und Demenz im Landkreis Ebersberg | 3,908   | 354                                        | 1,154                           | 1                             | 2,534              |
| Kuopio Ischemic Heart Disease Study                                                  | 1,399   | 222                                        | 370                             | 0                             | 849                |
| Northern Manhattan Study/The Oral Infections and Vascular Disease Epidemiology Study | 784     | 30                                         | 101                             | 0                             | 653                |
| Prospective Investigation of the Vasculature in Uppsala Seniors                      | 1,017   | 158                                        | 223                             | 190                           | 680                |
| Progression of Lesions in the Intima of the Carotid                                  | 1,782   | 58                                         | 146                             | 43                            | 1,538              |
| Rotterdam Study                                                                      | 7,983   | 1,239                                      | 4,903                           | 22                            | 2,611              |
| Study of Health in Pomerania                                                         | 4,308   | 91                                         | 2,478                           | 0                             | 1,751              |
| Tromsø Study                                                                         | 4,821   | 667                                        | 191                             | 0                             | 3,992              |

\* These numbers do not necessarily add up to N total, as subjects may have been excluded due to more than one reason

**Webtable A2: Sample size and number of exclusions by reason of exclusion**

|                                                                                      | <b>Sampling strategy</b>                                                                                                                                                                                                                                              | <b>Identification of endpoints</b>                                                                                                                                                                                               | <b>Were the subjects informed of their IMT results ?</b> |
|--------------------------------------------------------------------------------------|-----------------------------------------------------------------------------------------------------------------------------------------------------------------------------------------------------------------------------------------------------------------------|----------------------------------------------------------------------------------------------------------------------------------------------------------------------------------------------------------------------------------|----------------------------------------------------------|
| Atherosclerosis and Insulin Resistance study                                         | Subset of an age-stratum of a random sample from the male general population, selected by quintiles of a BMI/blood glucose score. Exclusion of subjects with cardiovascular disease, other established disease, cardiovascular drug treatment.                        | National death register<br>National registers of diagnoses at hospitalizations                                                                                                                                                   | Yes                                                      |
| Atherosclerosis Risk In Communities                                                  | Probability sampling or area sampling.                                                                                                                                                                                                                                | Annual telephone questionnaire<br>three-year examinations<br>community-wide surveillance procedures                                                                                                                              | Yes                                                      |
| Bogalusa Heart Study                                                                 | Recruited from schools in Bogalusa.                                                                                                                                                                                                                                   | Death endpoint:<br>newspaper obituaries<br>information from families, friends and colleagues of the deceased                                                                                                                     | No                                                       |
| Bruneck study                                                                        | Sex- and age-stratified random sample from the official population registry                                                                                                                                                                                           | Self-reported medical history in quinquennial visits<br>medical records provided by the general practitioners<br>death certificates<br>reviews of the Bruneck Hospital databases, which is the only hospital in the district     | Only plaques                                             |
| Carotid Atherosclerosis Progression Study                                            | Geografic sample of members of a company health insurance.                                                                                                                                                                                                            | Primary healthcare scheme records                                                                                                                                                                                                | Yes                                                      |
| Cardiovascular Health Study                                                          | Age, gender and race-stratified random samples from sampling frames from Medicare eligibility lists; exclusion of wheelchair-bound persons and subjects receiving hospice treatment, radiation therapy or chemotherapy for cancer.                                    | Semiannual contacts, alternating between telephone interviews<br>clinic visits                                                                                                                                                   | Yes                                                      |
| Edinburgh Artery Study                                                               | Age and sex stratified random sample from 10 general practices serving a range of socioeconomic and geographical areas.                                                                                                                                               | General practitioners<br>Information and Statistics Division of the Scottish Office Home and Health Department<br>Hospital notes<br>Annual participant questionnaires<br>United Kingdom National Health Service Central Registry | No                                                       |
| Etude sur le vieillissement artériel                                                 | Mostly recruited from the electoral rolls (random sample from population register) and to a lesser extent via information campaigns. When a subject was recruited, his or her spouse was systematically asked to participate if or she was in the required age range. | French National Registry of Death (INSEE)                                                                                                                                                                                        | No                                                       |
| Interventionsprojekt zerebrovaskuläre Erkrankungen und Demenz im Landkreis Ebersberg | All members of the largest health insurance company living in the community of Ebersberg > 55 years at baseline were invited.                                                                                                                                         | 2-Year visit<br>Health insurance database                                                                                                                                                                                        | Yes                                                      |
| Kuopio Ischemic Heart Disease Study                                                  | Age strata of male residents; exclusion in case of serious disease or migration.                                                                                                                                                                                      | National hospital discharge register<br>Finnish national death registry                                                                                                                                                          | No                                                       |
| Northern Manhattan Study/The Oral Infections and Vascular Disease Epidemiology Study | Random digit dialing, older than 39 years and resided in northern Manhattan for more than 3 months; exclusion of previous stroke.                                                                                                                                     | Annual telephone interviews                                                                                                                                                                                                      | No                                                       |
| Prospective Investigation of the Vasculature in Uppsala Seniors                      | Age stratum, random sample of community register.                                                                                                                                                                                                                     | National death register                                                                                                                                                                                                          | Only severe stenosis                                     |
| Progression of Lesions in the Intima of the Carotid                                  | Random sample of GP patient lists                                                                                                                                                                                                                                     | Visits every third year<br>phone interview every year                                                                                                                                                                            | Yes                                                      |
| Rotterdam Study                                                                      | Age stratified sample of community register.                                                                                                                                                                                                                          | Files from general practitioners in the study area<br>Municipal health authorities                                                                                                                                               | Only severe stenosis                                     |
| Study of Health in Pomerania                                                         | Age and gender stratified random sample from official inhabitant data files.                                                                                                                                                                                          | Follow-up examinations<br>Participant questionnaires                                                                                                                                                                             | Only plaques and stenoses                                |
| Tromsø Study                                                                         | Age and gender stratified sample of inhabitants in Tromsø, Norway. Exclusion of subjects with known myocardial infarction or ischemic stroke.                                                                                                                         | National and local diagnosis registries                                                                                                                                                                                          | No                                                       |

**Webtable A3: Study procedures by cohort**

|                                                                                      | Avoid plaques | ECG gated | Angle control                           | Multiple scans       | Same ultrasound machine | Same sonographer | Central reading | Edge-detection algorithm <sup>+</sup> | Other                                |
|--------------------------------------------------------------------------------------|---------------|-----------|-----------------------------------------|----------------------|-------------------------|------------------|-----------------|---------------------------------------|--------------------------------------|
| Atherosclerosis and Insulin Resistance study                                         | no            | yes       | no                                      | no                   | no                      | no               | yes             | yes                                   |                                      |
| Atherosclerosis Risk In Communities                                                  | no            | yes       | yes                                     | for CCA <sup>§</sup> | no                      | no               | yes             | no                                    |                                      |
| Bogalusa Heart Study                                                                 | no            | yes       | no                                      | no                   | no                      | no               | no <sup>#</sup> | no                                    |                                      |
| Bruneck study                                                                        | yes           | yes       | yes                                     | no                   | no                      | yes              | no              | no                                    | Rereading of baseline at follow-up   |
| Carotid Atherosclerosis Progression Study                                            | n.s.          | no        | no                                      | no                   | yes                     | no               | yes             | yes                                   |                                      |
| Cardiovascular Health Study                                                          | no*           | no        | no                                      | for ICA <sup>§</sup> | yes                     | no               | yes             | no                                    | Rereading of baseline at follow-up   |
| Edinburgh Artery Study                                                               | yes           | no        | vessel wall parallel to transducer face | no                   | no                      | no               | yes             | no                                    | yes                                  |
| Etude sur le vieillissement artériel                                                 | yes           | no        | internal landmarks <sup>++</sup>        | no                   | yes                     | no               | yes             | yes                                   |                                      |
| Interventionsprojekt zerebrovaskuläre Erkrankungen und Demenz im Landkreis Ebersberg | yes           | no        | yes                                     | yes                  | yes                     | yes              | yes             | yes                                   |                                      |
| Kuopio Ischemic Heart Disease Study                                                  | no            | no        | no                                      | no                   | no                      | no               | yes             | yes                                   |                                      |
| Northern Manhattan Study/The Oral Infections and Vascular Disease Epidemiology Study | yes           | no        | internal landmarks <sup>++</sup>        | no                   | yes                     | yes              | yes             | yes                                   | Same depth and angle at follow-up    |
| Prospective Investigation of the Vasculature in Uppsala Seniors                      | n.s.          | yes       | no                                      | no                   | yes                     | yes              | yes             | yes                                   |                                      |
| Progression of Lesions in the Intima of the Carotid                                  | yes           | no        | no                                      | no                   | yes                     | yes              | yes             | no                                    |                                      |
| Rotterdam Study                                                                      | no            | yes       | no                                      | yes                  | yes                     | no               | yes             | yes                                   |                                      |
| Study of Health in Pomerania                                                         | no            | no        | no                                      | no                   | yes                     | no               | yes             | yes                                   | Observer recertification; re-reading |
| Tromsø Study                                                                         | no*           | yes       | no                                      | yes                  | yes                     | no               | yes             | yes                                   |                                      |

n.s. = not specified in ultrasound instructions; <sup>+</sup> semiautomated algorithm to reliably detect the surface of the lumen-intima and the intima-media interfaces, instead of manual caliper measurement; <sup>§</sup> Multiple scans under different angles were used in ARIC for the CCA (anterior, posterior and optimal angle) and in CHS for the ICA (anterior, lateral and posterior angle); <sup>#</sup> central reading for baseline, but not for follow-up scans; <sup>++</sup> creation and storing of a mask outlining the internal vessel surface of the both neck sides during baseline scan; and recalling the mask during follow-up scan as a navigation aid; \* plaques purposely included

**Webtable A4: Measures taken to improve assessment of cIMT progression by included studies**

|                                              | Specific definition of the endpoint                                                                                                                                                                |                                                                                                                                                                                                                                                                                                                                                                                                                         |                                                                                                                                                                         | Number of events* (event rate <sup>†</sup> ) |               |               |                 |
|----------------------------------------------|----------------------------------------------------------------------------------------------------------------------------------------------------------------------------------------------------|-------------------------------------------------------------------------------------------------------------------------------------------------------------------------------------------------------------------------------------------------------------------------------------------------------------------------------------------------------------------------------------------------------------------------|-------------------------------------------------------------------------------------------------------------------------------------------------------------------------|----------------------------------------------|---------------|---------------|-----------------|
|                                              | Myocardial infarction (MI)                                                                                                                                                                         | Stroke                                                                                                                                                                                                                                                                                                                                                                                                                  | Vascular death (VD)                                                                                                                                                     | MI                                           | stroke        | VD            | death           |
| Atherosclerosis and Insulin Resistance study | Criteria of the Seven Country Study <sup>1</sup> :<br>1) ECG findings<br>2) Clinical judgment of heart disease<br>3) Etiology specified as MI (by history)<br><br>based on medical records         | Ischemic stroke was verified by the following criteria:<br>1) Clinical event with sudden or rapid onset<br>2) Lasting more than 24h or death<br>3) Neurological findings<br><br>Non-ischemic stroke was verified from CT<br>based on medical records                                                                                                                                                                    | Fatal MI<br><br><br>based on medical records                                                                                                                            | 9<br>(5.4)                                   | 5<br>(3.0)    | 2<br>(1.2)    | 9<br>(5.4)      |
| Atherosclerosis Risk In Communities          | Definite hospitalized MI: One or more criteria fulfilled:<br>1) Cardiac pain<br>2) Diagnostic ECG pattern<br>3) Abnormal enzymes<br><br>based on medical records                                   | National Survey of Stroke criteria <sup>2</sup><br>1) Clinical event with sudden or rapid onset<br>2) Lasting for more than 24 hours, or death<br>3) Neurological findings<br>4) Vascular origins limited to<br>a. thrombotic or embolic occlusion of a cerebral artery resulting in infarction<br>b. spontaneous rupture of a vessel resulting in intracerebral or subarachnoid hemorrhage<br>based on medical records | not assessed                                                                                                                                                            | 447<br>(4.4)                                 | 275<br>(2.7)  | -             | 772<br>(7.7)    |
| Bogalusa Heart Study                         | not assessed                                                                                                                                                                                       | not assessed                                                                                                                                                                                                                                                                                                                                                                                                            | fatal MI, fatal stroke, other vascular death<br>based on medical records and death certificates                                                                         | -                                            | -             | 3<br>(1.2)    | 12<br>(4.8)     |
| Bruneck Study                                | WHO criteria <sup>3</sup><br>1) Diagnostic ECG pattern<br>2) Typical history<br>3) Abnormal enzymes<br>based on medical records                                                                    | same as ARIC<br><br>based on medical records                                                                                                                                                                                                                                                                                                                                                                            | fatal MI, fatal stroke, fatal ICH, sudden cardiac death, and death due to rupture of aortic aneurysm<br>based on medical records and death certificates                 | 33<br>(5.7)                                  | 52<br>(9.0)   | 29<br>(5.0)   | 129<br>(22.4)   |
| Carotid Atherosclerosis Progression Study    | Based on ICD codes<br>ICD-9: 410<br>ICD-10: I21, I22                                                                                                                                               | Based on ICD codes<br>ICD-9: 430, 431, 433, 434, 436<br>ICD: I60-64                                                                                                                                                                                                                                                                                                                                                     | not assessed                                                                                                                                                            | 38<br>(2.2)                                  | 61<br>(3.5)   | -             | 37<br>(2.1)     |
| Cardiovascular Health Study, cohort 1        | same as ARIC<br><br>based on medical records                                                                                                                                                       | Modified Systolic Hypertension in the Elderly Program (SHEP) criteria <sup>4</sup> :<br>1) Clinical event on rapid onset of neurologic deficit or subarachnoid hemorrhage<br>2) Greater than 24 hours unless death<br>3) CT/MRI lesion<br>4) Not secondary to brain trauma, tumor or infection<br>based on medical records                                                                                              | fatal MI, fatal stroke, fatal coronary heart disease<br><br>based on medical records and death certificates                                                             | 502<br>(14.3)                                | 469<br>(13.4) | 643<br>(18.3) | 1,797<br>(51.3) |
| Cardiovascular Health Study, cohort 2        | see CHS cohort 1                                                                                                                                                                                   | see CHS cohort 1                                                                                                                                                                                                                                                                                                                                                                                                        | see CHS cohort 1                                                                                                                                                        | 26<br>(15.6)                                 | 34<br>(20.4)  | 28<br>(16.8)  | 79<br>(47.4)    |
| Edinburgh Artery Study                       | criteria of the American Heart Association <sup>5</sup> :<br>Two of the following criteria:<br>1) Cardiac pain<br>2) Diagnostic ECG pattern<br>3) Abnormal enzymes<br><br>based on medical records | criteria of the American Heart Association<br>one of the following criteria:<br>1) History of onset of symptoms of less than 48 hours, plus clinical confirmation of a focal or global disturbance of cerebral function lasting more than 24 hours<br>2) CT lesion<br>based on medical records                                                                                                                          | definite fatal MI, definite fatal stroke, other cardiovascular causes<br><br>based on autopsy records, hospital records, or UK National Health Service Central Registry | 8<br>(2.3)                                   | 12<br>(3.5)   | 17<br>(4.9)   | 53<br>(15.2)    |
| Etude sur le vieillissement artériel         | not assessed                                                                                                                                                                                       | not assessed                                                                                                                                                                                                                                                                                                                                                                                                            | based on National Statistics of Causes of Death records                                                                                                                 | -                                            | -             | 33<br>(2.5)   | 173<br>(13.3)   |

(Continues on next page)

|                                                                                       | Specific definition of the endpoint                                                                                                                                                                                                                                                                                                                                                   |                                                                                                                                                                                                                                                                                                                               |                                                                                                                                                                                           | Number of events* (event rate <sup>†</sup> ) |              |             |               |
|---------------------------------------------------------------------------------------|---------------------------------------------------------------------------------------------------------------------------------------------------------------------------------------------------------------------------------------------------------------------------------------------------------------------------------------------------------------------------------------|-------------------------------------------------------------------------------------------------------------------------------------------------------------------------------------------------------------------------------------------------------------------------------------------------------------------------------|-------------------------------------------------------------------------------------------------------------------------------------------------------------------------------------------|----------------------------------------------|--------------|-------------|---------------|
|                                                                                       | Myocardial infarction (MI)                                                                                                                                                                                                                                                                                                                                                            | Stroke                                                                                                                                                                                                                                                                                                                        | Vascular death (VD)                                                                                                                                                                       | MI                                           | stroke       | VD          | death         |
| (Continued from previous page)                                                        |                                                                                                                                                                                                                                                                                                                                                                                       |                                                                                                                                                                                                                                                                                                                               |                                                                                                                                                                                           |                                              |              |             |               |
| Interventions-projekt zerebrovaskuläre Erkrankungen und Demenz im Landkreis Ebersberg | according to <sup>6</sup><br>one of the following criteria:<br>1) cardiac enzyme abnormalities (troponin, CK-MB) plus one of the following two criteria<br>a. ischemic symptoms<br>b. electrocardiogram abnormalities<br>2) postmortem findings of an acute MI.<br>based on medical records, autopsy records and death certificates                                                   | WHO criteria <sup>7</sup> :<br>1) "rapidly developed clinical signs of focal or global disturbance of cerebral function, lasting more than 24 hours or until death, with no apparent non-vascular cause"<br>2) postmortem findings of an acute stroke<br><br>based on medical records, autopsy records and death certificates | not assessed                                                                                                                                                                              | 22<br>(2-1)                                  | 67<br>(6-5)  | -           | 172<br>(16-8) |
| Kuopio Ischemic Heart Disease Study                                                   | WHO MONICA/MORGAM criteria <sup>7</sup> ;<br>1) clinical symptoms and signs<br>2) electrocardiograms<br>3) cardiac biomarkers<br><br>based on medical records, autopsy records and death certificates                                                                                                                                                                                 | WHO MONICA criteria <sup>7</sup> :<br>"rapidly developed clinical signs of focal or global disturbance of cerebral function, lasting more than 24 hours or until death, with no apparent non-vascular cause"<br><br>based on medical records, autopsy records and death certificates                                          | ICD-10: I00-I99                                                                                                                                                                           | 138<br>(10-3)                                | 71<br>(5-3)  | 85<br>(6-4) | 186<br>(13-9) |
| Northern Manhattan Study/The Oral Infections and Vascular Disease Epidemiology Study  | Criteria adapted from the Cardiac Arrhythmia Suppression Trial and the Lipid Research Clinics Coronary Primary Prevention Trial <sup>8,9</sup><br>Two of the following three criteria:<br>1) cardiac pain determined to be typical angina;<br>2) cardiac enzyme abnormalities (CPK-MB fraction or troponin values);<br>3) electrocardiogram abnormalities<br>based on medical records | WHO criteria <sup>7</sup> :<br>"rapidly developed clinical signs of focal or global disturbance of cerebral function, lasting more than 24 hours or until death, with no apparent non-vascular cause"<br><br>based on medical records                                                                                         | Fatal MI, fatal ischemic stroke, heart failure, pulmonary embolus, cardiac arrhythmia, other vascular causes<br><br>based on information from family, medical records, death certificates | 0<br>(0-0)                                   | 8<br>(4-1)   | 13<br>(6-7) | 34<br>(17-6)  |
| Prospective Investigation of the Vasculature in Uppsala Seniors                       | not assessed                                                                                                                                                                                                                                                                                                                                                                          | not assessed                                                                                                                                                                                                                                                                                                                  | not assessed                                                                                                                                                                              | -                                            | -            | -           | 26<br>(20-6)  |
| Progression of Lesions in the Intima of the Carotid                                   | Self reported physician's diagnosis of MI, and confirmed by physician                                                                                                                                                                                                                                                                                                                 | Self reported physician's diagnosis of stroke and confirmed by physician                                                                                                                                                                                                                                                      | not assessed                                                                                                                                                                              | 10<br>(1-6)                                  | 10<br>(1-6)  | 5<br>(0-8)  | 17<br>(2-7)   |
| Rotterdam Study                                                                       | According to the International Classification of Diseases, 10th Edition (ICD-10)<br>From general practitioners and letters and discharge reports from medical specialists                                                                                                                                                                                                             | Typical symptoms that lasted longer than 24 hours<br>From general practitioners and letters and discharge reports from medical specialists, diagnosis reviewed and verified by stroke neurologist                                                                                                                             | not assessed                                                                                                                                                                              | 71<br>(4-7)                                  | 146<br>(9-6) | -           | 397<br>(26-2) |
| Study of Health in Pomerania                                                          | Self reported physician's diagnosis of MI                                                                                                                                                                                                                                                                                                                                             | Self reported physician's diagnosis of stroke                                                                                                                                                                                                                                                                                 | not assessed                                                                                                                                                                              | 15<br>(1-5)                                  | 10<br>(1-0)  | -           | 167<br>(16-2) |
| Tromsø Study                                                                          | Slightly modified WHO <sup>7</sup> criteria;<br>1) clinical symptoms and signs<br>2) electrocardiograms<br>3) cardiac biomarkers<br>based on medical records                                                                                                                                                                                                                          | same as NOMAS/INVEST<br><br>based on medical records                                                                                                                                                                                                                                                                          | fatal MI, fatal stroke<br><br>based on medical records, autopsy records, death certificates                                                                                               | 200<br>(11-4)                                | 119<br>(6-8) | 62<br>(3-5) | 208<br>(11-9) |

\* beginning after the 2<sup>nd</sup> ultrasound visit, after exclusion of subjects with previous events; <sup>†</sup>event rate per 1000 person years

References for this table:

1. Keys A (ed): Coronary heart disease in seven countries. *Circulation* 1970;41(suppl I):11-119
2. The National Survey of Stroke, National Institute of Neurological and Communicative Disorders and Stroke. *Stroke* 1981; 12(Suppl 1): 11-191.
3. World Health Organization, Working Group on the Establishment of Ischemic Heart Disease Registers. Report of the Fifth Working Group, Copenhagen. In: Report no. Eur 8201 (5). World Health Organization, Geneva, 1971
4. SHEP Cooperative Research Group. Prevention of stroke by antihypertensive drug treatment in older persons with isolated systolic hypertension: Final results of the Systolic Hypertension in the Elderly Program (SHEP). *JAMA*. 1991; 265:3255-64
5. Gillum RF, Fortmann SP, Prineas RJ, Kottke TE. International diagnostic criteria for acute myocardial infarction and acute stroke. *Am Heart J* 1984; 108: 150-58
6. Alpert JS, Thygesen K, Antman E, Bassand JP: Myocardial infarction redefined—A consensus document of the Joint European Society of Cardiology/American College of Cardiology committee for the redefinition of myocardial infarction. *J Am Coll Cardiol* 36:959-969, 2000
7. The World Health Organization MONICA Project (monitoring trends and determinants in cardiovascular disease): a major international collaboration. WHO MONICA Project Principal Investigators. *J Clin Epidemiol*. 1988; 41: 105-14.
8. Greene HL, Richardson DW, Barker AH, Roden DM, Capone RJ, Echt DS, Friedman LM, Gillespie MJ, Hallstrom AP, Verter J. Classification of deaths after myocardial infarction as arrhythmic or nonarrhythmic (the Cardiac Arrhythmia Pilot Study). *Am J Cardiol*. 1989;63:1-6.
9. Morris DL, Kritchevsky SB, Davis CE. Serum carotenoids and coronary heart disease. The lipid research clinics coronary primary prevention trial and follow-up study. *JAMA*. 1994;272:1439-1441.

**Webtable A5: Endpoint event definitions and number of events in included studies**

|                                                                                       | Mean (SD) {n} of mean CCA-IMT [mm] |                              |                              |                              | Mean (SD) {n} of maximal CCA-IMT [mm] |                              |                              |                              | Mean (SD) {n} of meanmax IMT [mm] |                             |                             |                             | Pearsons correlation of two occasions                             |                 |                                    |
|---------------------------------------------------------------------------------------|------------------------------------|------------------------------|------------------------------|------------------------------|---------------------------------------|------------------------------|------------------------------|------------------------------|-----------------------------------|-----------------------------|-----------------------------|-----------------------------|-------------------------------------------------------------------|-----------------|------------------------------------|
|                                                                                       | Visit 1                            | Visit 2                      | Mean of visits 1 and 2       | Annual progression           | Visit 1                               | Visit 2                      | Mean of visits 1 and 2       | Annual progression           | Visit 1                           | Visit 2                     | Mean of visits 1 and 2      | Annual progression          | between mean CCA-IMT <sup>†</sup> and annual mean IMT progression | of mean CCA-IMT | of annual mean CCA-IMT progression |
| Atherosclerosis and Insulin Resistance study                                          | 0.794<br>(0.121)<br>{297}          | 0.798<br>(0.136)<br>{297}    | 0.796<br>(0.121)<br>{297}    | 0.001<br>(0.028)<br>{297}    | 0.958<br>(0.155)<br>{297}             | 1.002<br>(0.184)<br>{297}    | 0.980<br>(0.156)<br>{297}    | 0.010<br>(0.044)<br>{297}    | 1.157<br>(0.230)<br>{297}         | 1.196<br>(0.252)<br>{297}   | 1.177<br>(0.233)<br>{297}   | 0.009<br>(0.040)<br>{297}   | 0.16                                                              | 0.76            | n.a.                               |
| Atherosclerosis Risk In Communities                                                   | 0.644<br>(0.127)<br>{12,221}       | 0.676<br>(0.129)<br>{12,221} | 0.660<br>(0.116)<br>{12,221} | 0.011<br>(0.038)<br>{12,221} | 0.749<br>(0.150)<br>{12,221}          | 0.793<br>(0.150)<br>{12,221} | 0.771<br>(0.135)<br>{12,221} | 0.015<br>(0.045)<br>{12,221} | 0.867<br>(0.257)<br>{7,507}       | 0.906<br>(0.254)<br>{9,535} | 0.895<br>(0.232)<br>{6,451} | 0.016<br>(0.076)<br>{6,451} | 0.07                                                              | 0.64            | -0.02 <sup>#</sup>                 |
| Bogalusa Heart Study                                                                  | N/A                                | N/A                          | N/A                          | N/A                          | 0.756<br>(0.134)<br>{558}             | 0.758<br>(0.143)<br>{558}    | 0.757<br>(0.125)<br>{558}    | 0.001<br>(0.052)<br>{558}    | 0.816<br>(0.173)<br>{558}         | 0.836<br>(0.174)<br>{558}   | 0.826<br>(0.164)<br>{558}   | 0.008<br>(0.053)<br>{558}   | 0.09*                                                             | 0.63*           | n.a.                               |
| Bruneck study                                                                         | 0.838<br>(0.164)<br>{633}          | N/A                          | N/A                          | N/A                          | 0.888<br>(0.204)<br>{633}             | 1.024<br>(0.183)<br>{633}    | 0.956<br>(0.182)<br>{633}    | 0.027<br>(0.270)<br>{633}    | 0.862<br>(0.186)<br>{633}         | 0.965<br>(0.157)<br>{633}   | 0.914<br>(0.161)<br>{633}   | 0.021<br>(0.025)<br>{633}   | -0.16*                                                            | 0.76*           | n.a.                               |
| Carotid Atherosclerosis Progression Study                                             | 0.732<br>(0.148)<br>{3,283}        | 0.735<br>(0.137)<br>{3,283}  | 0.733<br>(0.131)<br>{3,283}  | 0.001<br>(0.036)<br>{3,283}  | N/A                                   | N/A                          | N/A                          | N/A                          | N/A                               | N/A                         | N/A                         | N/A                         | -0.11                                                             | 0.69            | n.a.                               |
| Cardiovascular Health Study, cohort 1                                                 | 0.859<br>(0.155)<br>{3,551}        | 0.873<br>(0.169)<br>{3,551}  | 0.866<br>(0.147)<br>{3,551}  | 0.005<br>(0.047)<br>{3,551}  | 1.031<br>(0.197)<br>{3,551}           | 1.059<br>(0.220)<br>{3,551}  | 1.045<br>(0.188)<br>{3,551}  | 0.010<br>(0.063)<br>{3,551}  | 1.192<br>(0.316)<br>{3,551}       | 1.231<br>(0.336)<br>{3,551} | 1.211<br>(0.305)<br>{3,551} | 0.013<br>(0.079)<br>{3,551} | 0.12                                                              | 0.65            | n.a.                               |
| Cardiovascular Health Study, cohort 2                                                 | 0.901<br>(0.165)<br>{297}          | 0.955<br>(0.195)<br>{297}    | 0.928<br>(0.160)<br>{297}    | 0.009<br>(0.029)<br>{297}    | 1.093<br>(0.197)<br>{297}             | 1.098<br>(0.240)<br>{297}    | 1.095<br>(0.193)<br>{297}    | 0.001<br>(0.035)<br>{297}    | 1.218<br>(0.284)<br>{297}         | 1.355<br>(0.431)<br>{297}   | 1.286<br>(0.329)<br>{297}   | 0.023<br>(0.053)<br>{297}   | 0.21                                                              | 0.56            | n.a.                               |
| Edinburgh Artery Study                                                                | 0.753<br>(0.278)<br>{613}          | 0.949<br>(0.187)<br>{613}    | 0.851<br>(0.188)<br>{613}    | 0.030<br>(0.044)<br>{613}    | N/A                                   | N/A                          | N/A                          | N/A                          | N/A                               | N/A                         | N/A                         | N/A                         | -0.38                                                             | 0.27            | n.a.                               |
| Etude sur le vieillissement artériel                                                  | 0.658<br>(0.111)<br>{922}          | 0.670<br>(0.114)<br>{922}    | 0.664<br>(0.103)<br>{922}    | 0.006<br>(0.045)<br>{922}    | N/A                                   | N/A                          | N/A                          | N/A                          | N/A                               | N/A                         | N/A                         | N/A                         | 0.04 <sup>#</sup>                                                 | 0.69            | n.a.                               |
| Interventions-projekt zerebrovaskuläre Erkrankungen und Demenz im Landkreis Ebersberg | 0.806<br>(0.191)<br>{2,534}        | 0.827<br>(0.193)<br>{2,534}  | 0.816<br>(0.174)<br>{2,534}  | 0.010<br>(0.076)<br>{2,534}  | N/A                                   | N/A                          | N/A                          | N/A                          | N/A                               | N/A                         | N/A                         | N/A                         | 0.01 <sup>#</sup>                                                 | 0.64            | -0.04 <sup>#</sup>                 |

(Continues on next page)

|                                                                                      | Mean (SD) {n} of mean CCA-IMT [mm] |                             |                             |                             | Mean (SD) {n} of maximal CCA-IMT [mm] |                             |                             |                             | Mean (SD) {n} of meanmax IMT [mm] |                             |                             |                               | Pearsons correlation of two occasions                             |                 |                                    |
|--------------------------------------------------------------------------------------|------------------------------------|-----------------------------|-----------------------------|-----------------------------|---------------------------------------|-----------------------------|-----------------------------|-----------------------------|-----------------------------------|-----------------------------|-----------------------------|-------------------------------|-------------------------------------------------------------------|-----------------|------------------------------------|
|                                                                                      | Visit 1                            | Visit 2                     | Mean of visits 1 and 2      | Annual progression          | Visit 1                               | Visit 2                     | Mean of visits 1 and 2      | Annual progression          | Visit 1                           | Visit 2                     | Mean of visits 1 and 2      | Annual progression            | between mean CCA-IMT <sup>†</sup> and annual mean IMT progression | of mean CCA-IMT | of annual mean CCA-IMT progression |
| (Continued from previous page)                                                       |                                    |                             |                             |                             |                                       |                             |                             |                             |                                   |                             |                             |                               |                                                                   |                 |                                    |
| Kuopio Ischemic Heart Disease Study                                                  | 0.713<br>(0.154)<br>{849}          | 0.862<br>(0.186)<br>{849}   | 0.805<br>(0.158)<br>{849}   | 0.028<br>(0.033)<br>{849}   | 0.929<br>(0.205)<br>{849}             | 1.190<br>(0.266)<br>{849}   | 1.059<br>(0.219)<br>{849}   | 0.065<br>(0.049)<br>{849}   | N/A                               | N/A                         | N/A                         | N/A                           | 0.16                                                              | 0.72            | -0.06 <sup>#</sup>                 |
| Northern Manhattan Study/The Oral Infections and Vascular Disease Epidemiology Study | 0.712<br>(0.086)<br>{653}          | 0.747<br>(0.108)<br>{653}   | 0.729<br>(0.083)<br>{653}   | 0.008<br>(0.030)<br>{653}   | 0.921<br>(0.963)<br>{653}             | 0.956<br>(0.115)<br>{653}   | 0.938<br>(0.091)<br>{653}   | 0.009<br>(0.032)<br>{653}   | 0.892<br>(0.072)<br>{653}         | 0.934<br>(0.100)<br>{653}   | 0.913<br>(0.071)<br>{653}   | 0.011<br>(0.030)<br>{653}     | 0.25                                                              | 0.47            | n.a.                               |
| Prospective Investigation of the Vasculature in Uppsala Seniors                      | 0.905<br>(0.157)<br>{680}          | 0.949<br>(0.168)<br>{680}   | 0.927<br>(0.144)<br>{680}   | 0.009<br>(0.029)<br>{680}   | 1.025<br>(0.186)<br>{680}             | 1.103<br>(0.208)<br>{680}   | 1.064<br>(0.173)<br>{680}   | 0.015<br>(0.037)<br>{680}   | N/A                               | N/A                         | N/A                         | N/A                           | 0.08                                                              | 0.58            | n.a.                               |
| Progression of Lesions in the Intima of the Carotid                                  | 0.647<br>(0.140)<br>{1,538}        | 0.680<br>(0.138)<br>{1,538} | 0.663<br>(0.133)<br>{1,538} | 0.014<br>(0.036)<br>{1,538} | 0.726<br>(0.154)<br>{1,538}           | 0.745<br>(0.152)<br>{1,538} | 0.735<br>(0.146)<br>{1,538} | 0.009<br>(0.043)<br>{1,538} | N/A                               | N/A                         | N/A                         | N/A                           | -0.03 <sup>#</sup>                                                | 0.84            | n.a.                               |
| Rotterdam Study                                                                      | 0.757<br>(0.136)<br>{2,610}        | 0.867<br>(0.148)<br>{2,610} | 0.812<br>(0.131)<br>{2,610} | 0.017<br>(0.017)<br>{2,610} | 0.975<br>(0.175)<br>{2,324}           | 1.074<br>(0.188)<br>{2,324} | 1.025<br>(0.168)<br>{2,324} | 0.016<br>(0.023)<br>{2,324} | N/A                               | N/A                         | N/A                         | N/A                           | 0.14                                                              | 0.69            | n.a.                               |
| Study of Health in Pomerania                                                         | 0.771<br>(0.153)<br>{1,751}        | 0.803<br>(0.164)<br>{1,751} | 0.787<br>(0.148)<br>{1,751} | 0.006<br>(0.022)<br>{1,751} | 0.902<br>(0.195)<br>{1,751}           | 0.906<br>(0.219)<br>{1,751} | 0.904<br>(0.191)<br>{1,751} | 0.001<br>(0.031)<br>{1,751} | N/A                               | N/A                         | N/A                         | N/A                           | 0.11                                                              | 0.74            | n.a.                               |
| Tromsø Study                                                                         | 0.769<br>(0.150)<br>{3,992}        | 0.797<br>(0.164)<br>{3,992} | 0.783<br>(0.145)<br>{3,992} | 0.004<br>(0.019)<br>{3,992} | 0.953<br>(0.194)<br>{3,992}           | 0.984<br>(0.209)<br>{3,992} | 0.968<br>(0.184)<br>{3,992} | 0.005<br>(0.026)<br>{3,992} | 1.144<br>(0.297)<br>{3,776}       | 1.134<br>(0.295)<br>{3,702} | 1.143<br>(0.266)<br>{3,532} | -0.0003<br>(0.043)<br>{3,535} | 0.11                                                              | 0.70            | n.a.                               |

<sup>†</sup> mean of baseline and follow-up; \* correlation for maximal CCA-IMT, mean CCA-IMT was not available for both visits; <sup>#</sup> not significantly different from zero.

**Webtable A6: Estimates of cIMT and cIMT progression following different definitions by study**



| Specific characteristic                                            | Adjustment level* | Endpoint | Studies included                                                                                                      | Annual cIMT progression                         |                                 | Mean cIMT of scan 1 and 2 |                                 |              |
|--------------------------------------------------------------------|-------------------|----------|-----------------------------------------------------------------------------------------------------------------------|-------------------------------------------------|---------------------------------|---------------------------|---------------------------------|--------------|
|                                                                    |                   |          |                                                                                                                       | Overall HR (95% CI)                             | I <sup>2</sup> (p) <sup>#</sup> | Overall HR (95% CI)       | I <sup>2</sup> (p) <sup>#</sup> |              |
| Maximal CCA-IMT                                                    | model 1           | combined | AIR, ARIC, Bruneck, CHS1, CHS2, KIID, NOMAS/INVEST, PLIC, Rotterdam, SHIP, Tromsø                                     | 1.01 (0.97-1.04)                                | 0.0% (0.457)                    | -                         | -                               |              |
|                                                                    | model 2           |          |                                                                                                                       | 1.00 (0.95-1.04)                                | 32.8% (0.137)                   | 1.27 (1.19-1.35)          | 64.5% (0.002)                   |              |
|                                                                    | model 3           |          |                                                                                                                       | 1.00 (0.95-1.04)                                | 33.2% (0.133)                   | 1.26 (1.19-1.33)          | 53.0% (0.019)                   |              |
|                                                                    | model 4           |          |                                                                                                                       | 0.99 (0.95-1.04)                                | 34.0% (0.127)                   | 1.16 (1.10-1.23)          | 50.8% (0.026)                   |              |
| Maximal CCA-IMT                                                    | model 1           | death    | AIR, ARIC, BHS, Bruneck, CHS1, CHS2, KIID, NOMAS, PIVUS, PLIC, Rotterdam, SHIP, Tromsø                                | 1.10 (0.98-1.04)                                | 1.9% (0.428)                    | -                         | -                               |              |
|                                                                    | model 2           |          |                                                                                                                       | 0.99 (0.96-1.02)                                | 0.0% (0.774)                    | 1.20 (1.13-1.27)          | 47.8% (0.028)                   |              |
|                                                                    | model 3           |          |                                                                                                                       | 0.99 (0.96-1.03)                                | 0.0% (0.767)                    | 1.19 (1.14-1.24)          | 22.2% (0.217)                   |              |
|                                                                    | model 4           |          |                                                                                                                       | 0.99 (0.96-1.02)                                | 0.0% (0.788)                    | 1.14 (1.10-1.18)          | 0.0% (0.469)                    |              |
| Meanmax IMT                                                        | model 1           | combined | AIR, ARIC, CHS1, NOMAS/INVEST, Tromsø                                                                                 | 0.97 (0.92-1.02)                                | 23.6% (0.264)                   | -                         | -                               |              |
|                                                                    | model 2           |          |                                                                                                                       | 0.96 (0.91-1.02)                                | 38.5% (0.164)                   | 1.36 (1.25-1.47)          | 69.9% (0.010)                   |              |
|                                                                    | model 3           |          |                                                                                                                       | 0.96 (0.91-1.02)                                | 37.4% (0.172)                   | 1.35 (1.25-1.47)          | 67.3% (0.016)                   |              |
|                                                                    | model 4           |          |                                                                                                                       | 0.97 (0.92-1.02)                                | 26.1% (0.248)                   | 1.22 (1.11-1.34)          | 73.5% (0.004)                   |              |
| Per 0.1mm difference (mean CCA-IMT)                                | model 1           | combined | AIR, ARIC, CAPS, CHS1, CHS2, EAS, INVADE, KIID, NOMAS/INVEST, PLIC, Rotterdam, SHIP, Tromsø                           | 0.97 (0.88-1.07)                                | 16.1% (0.282)                   | -                         | -                               |              |
|                                                                    | model 2           |          |                                                                                                                       | 0.94 (0.87-1.01)                                | 0.0% (0.485)                    | 1.16 (1.10-1.23)          | 80.8% (<0.001)                  |              |
|                                                                    | model 3           |          |                                                                                                                       | 0.94 (0.87-1.01)                                | 0.0% (0.513)                    | 1.16 (1.10-1.22)          | 73.0% (<0.001)                  |              |
|                                                                    | model 4           |          |                                                                                                                       | 0.95 (0.88-1.03)                                | 0.0% (0.672)                    | 1.11 (1.07-1.15)          | 47.8% (0.028)                   |              |
| Non-imputed datasets (mean CCA-IMT)                                | model 1           | combined | AIR, ARIC, CAPS, CHS1, CHS2, EAS, INVADE, KIID, NOMAS/INVEST, PLIC, Rotterdam, SHIP, Tromsø                           | 0.99 (0.96-1.02)                                | 9.8% (0.347)                    | -                         | -                               |              |
|                                                                    | model 2           |          |                                                                                                                       | 0.98 (0.95-1.01)                                | 0.0% (0.478)                    | 1.24 (1.17-1.31)          | 64.6% (0.001)                   |              |
|                                                                    | model 3           |          |                                                                                                                       | 0.98 (0.96-1.01)                                | 0.0% (0.422)                    | 1.23 (1.17-1.30)          | 53.7% (0.011)                   |              |
|                                                                    | model 4           |          |                                                                                                                       | 0.98 (0.95-1.01)                                | 0.0% (0.484)                    | 1.14 (1.08-1.21)          | 46.3% (0.034)                   |              |
| Normalized IMT (progression) variable (mean CCA-IMT)               | model 4           | combined | AIR, ARIC, CAPS, CHS1, CHS2, EAS, INVADE, KIID, NOMAS/INVEST, PLIC, Rotterdam, SHIP, Tromsø                           | 0.98 (0.96-1.00)                                | 0.0% (0.520)                    | 1.19 (1.12-1.26)          | 57.2% (0.005)                   |              |
| Mean CCA-IMT by quintiles <sup>+</sup> : quintile 2 vs. 1 (lowest) | model 4           | combined | AIR, ARIC, CAPS, CHS1, CHS2, EAS, INVADE, KIID, NOMAS/INVEST, PLIC, Rotterdam, SHIP, Tromsø                           | 0.99 (0.85-1.15)                                | 31.7% (0.133)                   | 1.31 (1.12-1.52)          | 0.8% (0.434)                    |              |
|                                                                    |                   |          |                                                                                                                       | quintile 3 vs. 1 (lowest)                       | 0.94 (0.80-1.09)                | 25.5% (0.187)             | 1.40 (1.22-1.60)                | 0.0% (0.636) |
|                                                                    |                   |          |                                                                                                                       | quintile 4 vs. 1 (lowest)                       | 0.95 (0.86-1.07)                | 2.6% (0.419)              | 1.55 (1.35-1.77)                | 0.0% (0.662) |
|                                                                    |                   |          |                                                                                                                       | quintile 5 vs. 1 (lowest)                       | 0.91 (0.82-1.01)                | 0.0% (0.576)              | 1.86 (1.62-2.13)                | 0.0% (0.476) |
| Mean CCA-IMT stratified by sex:                                    | model 4           | combined | AIR, ARIC, CAPS, CHS1, CHS2, EAS, INVADE, KIID, NOMAS/INVEST, PLIC, Rotterdam, SHIP, Tromsø                           | 0.98 (0.94-1.02)                                | 0.0% (0.865)                    | 1.12 (1.05-1.19)          | 38.6% (0.076)                   |              |
|                                                                    |                   |          |                                                                                                                       | men                                             |                                 |                           |                                 |              |
| women                                                              |                   |          | ARIC, CAPS, CHS1, CHS2, EAS, INVADE, KIID, NOMAS/INVEST, Rotterdam, SHIP, Tromsø                                      | 0.97 (0.93-1.02)                                | 0.0% (0.837)                    | 1.16 (1.10-1.21)          | 38.6% (0.032)                   |              |
| Mean CCA-IMT stratified by ultrasound protocol:                    | model 4           | combined | EAS, INVADE, NOMAS/INVEST, PLIC                                                                                       | 0.99 (0.85-1.15)                                | 23.3% (0.271)                   | 1.19 (1.06-1.32)          | 0.0% (0.583)                    |              |
|                                                                    |                   |          |                                                                                                                       | Studies avoiding plaques in the IMT measurement |                                 |                           |                                 |              |
| Studies including plaques in the IMT measurement                   |                   |          | AIR, ARIC, CAPS, CHS1, CHS2, KIID, Rotterdam, SHIP, Tromsø                                                            | 0.97 (0.95-1.00)                                | 0.0% (0.841)                    | 1.15 (1.08-1.22)          | 61.6% (0.008)                   |              |
| Mean CCA-IMT including published results from MESA                 | model 4           | stroke   | ARIC, CAPS, CHS1, CHS2, EAS, INVADE, KIID, NOMAS/INVEST, PLIC, Rotterdam, SHIP, Tromsø, published estimates from MESA | 1.02 (0.96-1.09)                                | 19.2% (0.250)                   | 1.18 (1.05-1.31)          | 63.9% (<0.001)                  |              |

\* model 1: adjusted for age and sex; model 2: adjusted for age, sex and mean cIMT of scan 1 and 2; model 3: adjusted for age, sex, mean cIMT of scan 1 and 2, ethnicity and socioeconomic status; model 4: adjusted for age, sex, mean cIMT of scan 1 and 2, ethnicity, socioeconomic status, systolic blood pressure, antihypertensive treatment, total cholesterol, lipid-lowering treatment, creatinine, hemoglobin, smoking and diabetes; <sup>#</sup>p-value of test for heterogeneity; <sup>+</sup> The analysis by quintiles was done on non-imputed data, as the imputation of cIMT values resulted in changing strata and therefore in non-integer sample size per stratum

**Webtable A7: Sensitivity analyses: overall hazard ratios (per one SD increase unless otherwise indicated)**

|                                                                                                                                 | mean (SD) of common carotid artery intima media thickness progression [mm/year] |                                  |                     |
|---------------------------------------------------------------------------------------------------------------------------------|---------------------------------------------------------------------------------|----------------------------------|---------------------|
|                                                                                                                                 | 2 ultrasound visits                                                             | derived from 3 ultrasound visits | 4 ultrasound visits |
| Atherosclerosis and Insulin Resistance study (subset with 3 ultrasound visits, n=267)                                           | 0-0012 (0-0276)                                                                 | 0-0134 (0-0133)                  | -                   |
| Atherosclerosis Risk In Communities (subset with 3 ultrasound visits, n=6,191)                                                  | 0-0120 (0-0477)                                                                 | 0-0203 (0-0256)                  | -                   |
| Atherosclerosis Risk In Communities (subset with 4 ultrasound visits, n=1,564)                                                  | 0-0115 (0-0473)                                                                 | -                                | 0-0174 (0-0150)     |
| Cardiovascular Health Study, cohort1 (subset with 3 ultrasound visits, n=1,921)                                                 | 0-0052 (0-0431)                                                                 | 0-0095 (0-0199)                  | -                   |
| Etude sur le vieillissement artériel (subset with 3 ultrasound visits, n=845)                                                   | 0-0055 (0-0454)                                                                 | 0-0113 (0-0265)                  | -                   |
| Interventionsprojekt zerebrovaskuläre Erkrankungen und Demenz im Landkreis Ebersberg (subset with 3 ultrasound visits, n=1,986) | 0-0094 (0-0770)                                                                 | 0-0044 (0-0396)                  | -                   |
| Interventionsprojekt zerebrovaskuläre Erkrankungen und Demenz im Landkreis Ebersberg (subset with 4 ultrasound visits, n=1,309) | 0-0113 (0-0747)                                                                 | -                                | 0-0080 (0-0295)     |
| Kuopio Ischemic Heart Disease Study (subset with 3 ultrasound visits, n=692)                                                    | 0-0275 (0-0316)                                                                 | 0-0279 (0-0323)                  | -                   |
| Kuopio Ischemic Heart Disease Study (subset with 4 ultrasound visits, n=560)                                                    | 0-0274 (0-0302)                                                                 | -                                | 0-0129 (0-0098)     |
| Northern Manhattan Study/The Oral Infections and Vascular Disease Epidemiology Study (subset with 3 ultrasound visits, n=488)   | 0-0082 (0-0301)                                                                 | 0-0306 (0-0163)                  | -                   |
| Progression of Lesions in the Intima of the Carotid (subset with 3 ultrasound visits, n=1,467)                                  | 0-0144 (0-0359)                                                                 | 0-0178 (0-0177)                  | -                   |
| Study of Health in Pomerania (subset with 3 ultrasound visits, n=758)                                                           | 0-0043 (0-0206)                                                                 | -0-0033 (0-0109)                 | -                   |
| Tromsø Study (subset with 3 ultrasound visits, n=2,407)                                                                         | 0-0048 (0-0178)                                                                 | 0-0114 (0-0096)                  | -                   |

**Webtable A8: Comparison of cIMT progression estimates derived from 2, 3 or 4 ultrasound visits**

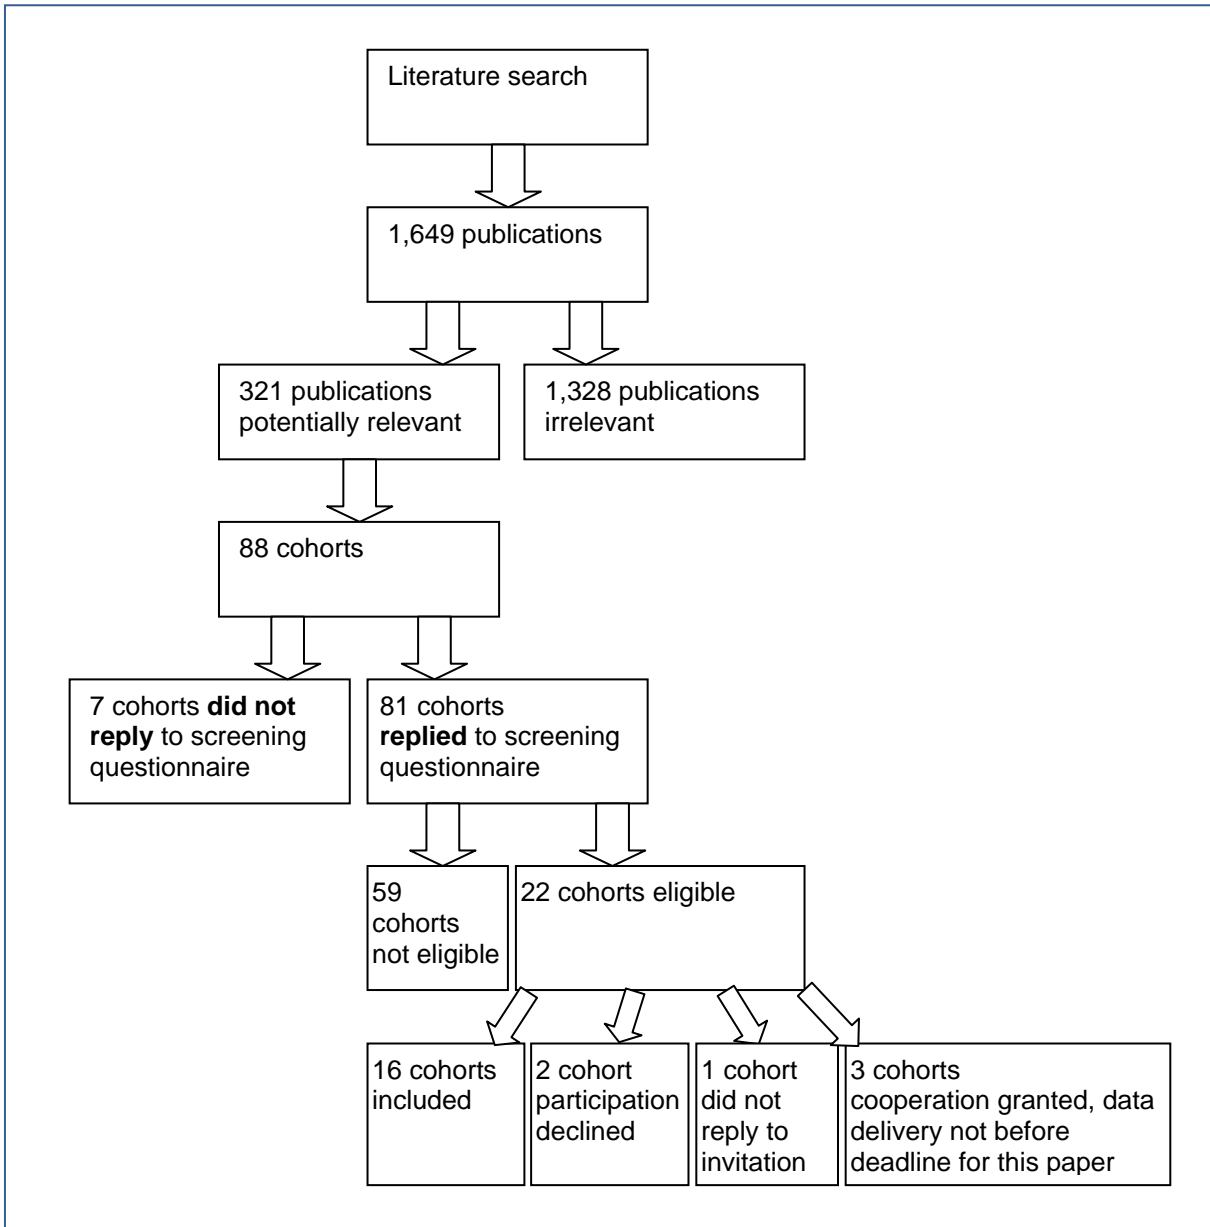

**Webfigure A1: Number of publications and studies screened and included**

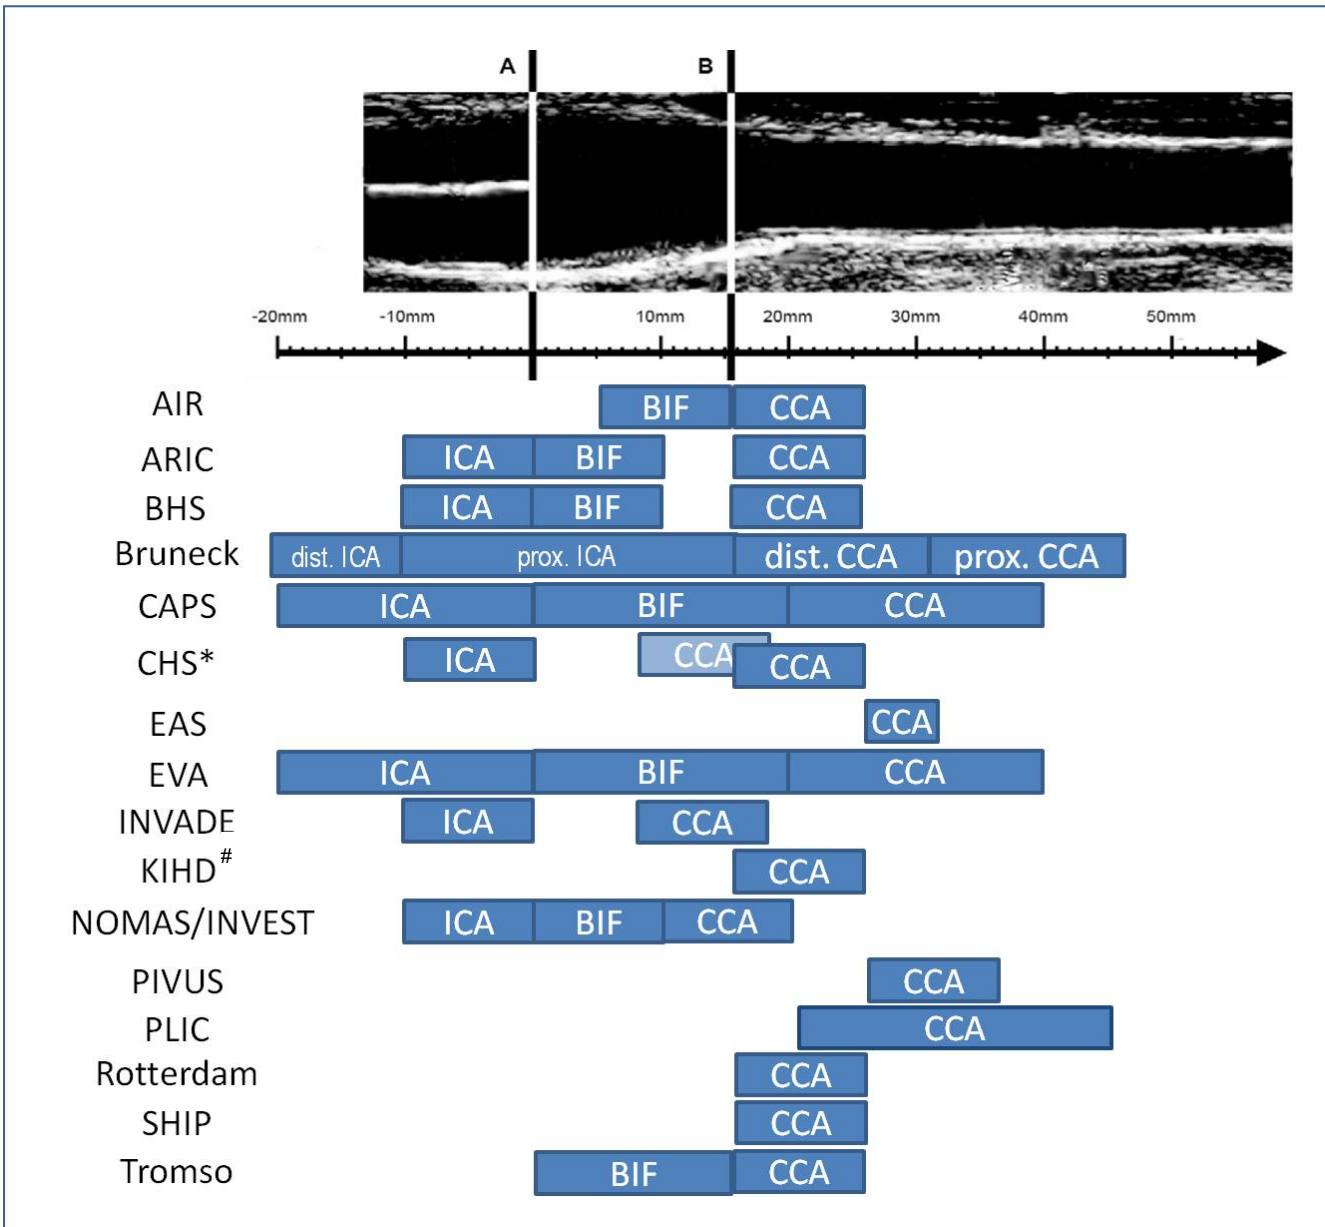

**Webfigure A2: Segment definitions across included studies**

CCA = common carotid artery; BIF = carotid bifurcation; ICA = internal carotid artery; \* CCA definition in the CHS: If the beginning of the bulbous widening is determinable, a 1cm segment proximal, else a segment extending from 8 to 18mm proximal to the tip of the flow divider; # CCA definition in the KIH: A 1 to 1.5cm segment proximal to the bulbous widening.

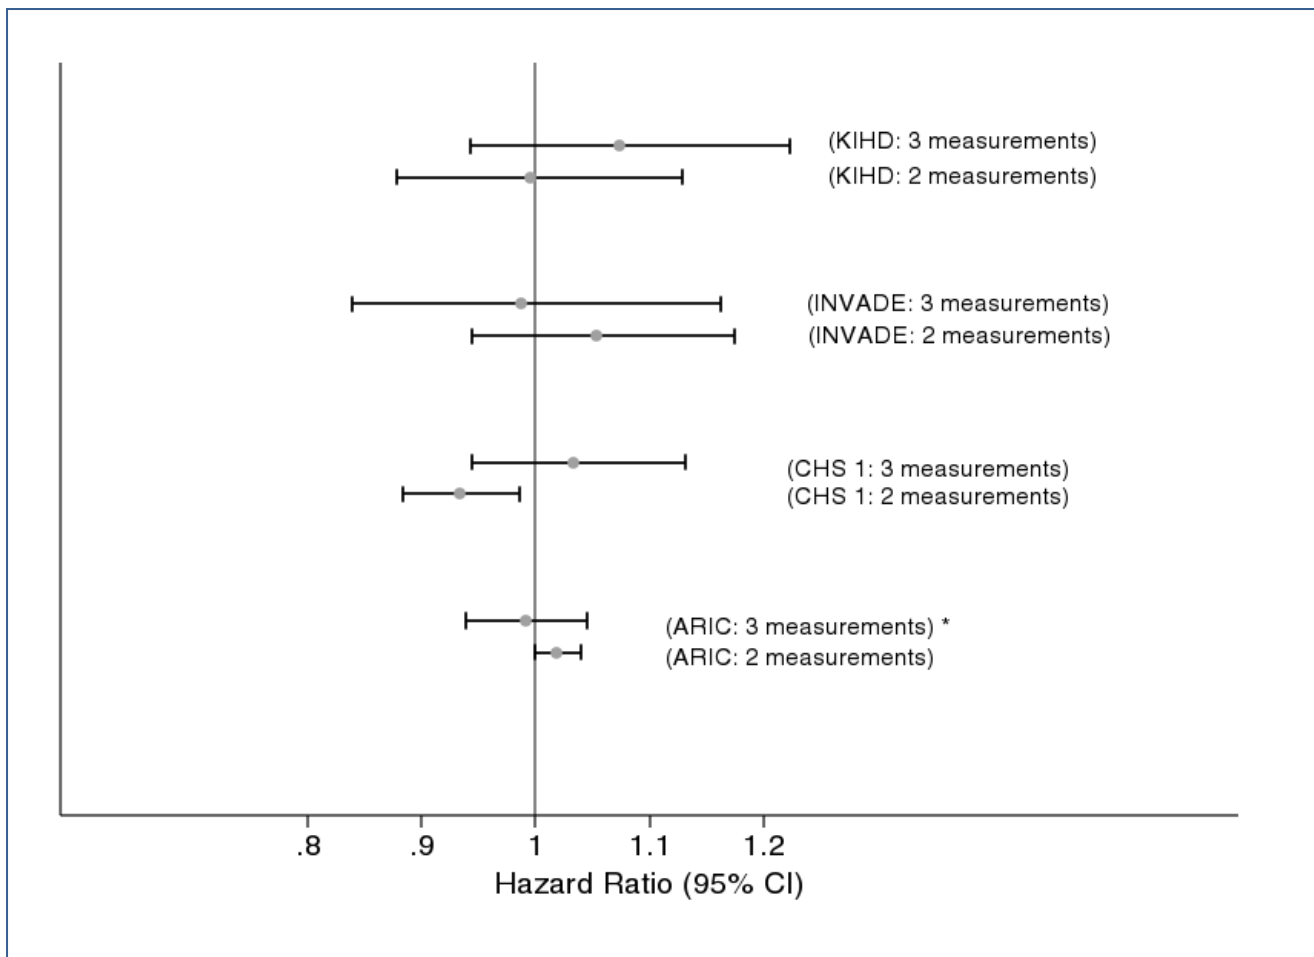

**Webfigure A3: Comparison of overall hazard ratios of combined endpoint per one SD increase in mean common carotid artery intima media thickness progression, based on 2 and 3 ultrasound visits**

Results are adjusted for age, sex and mean IMT (model 2, see text). \*In ARIC, a minority of participants was seen at both visits 3 and 4, but most subjects attended visit 3 or 4. Therefore, measurements from the visits 1, 2 and 3 or from the visits 1, 2 and 4 were used here.

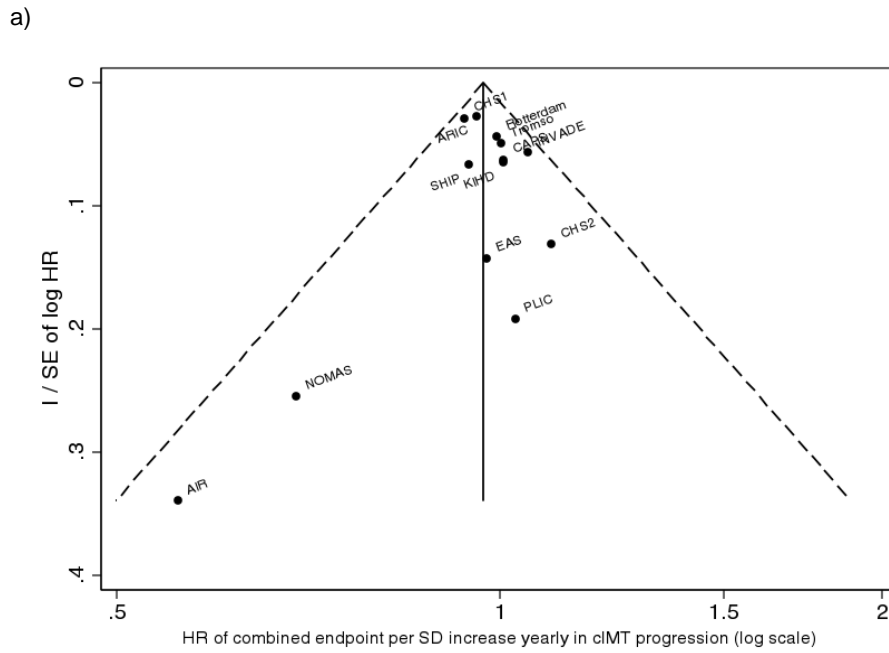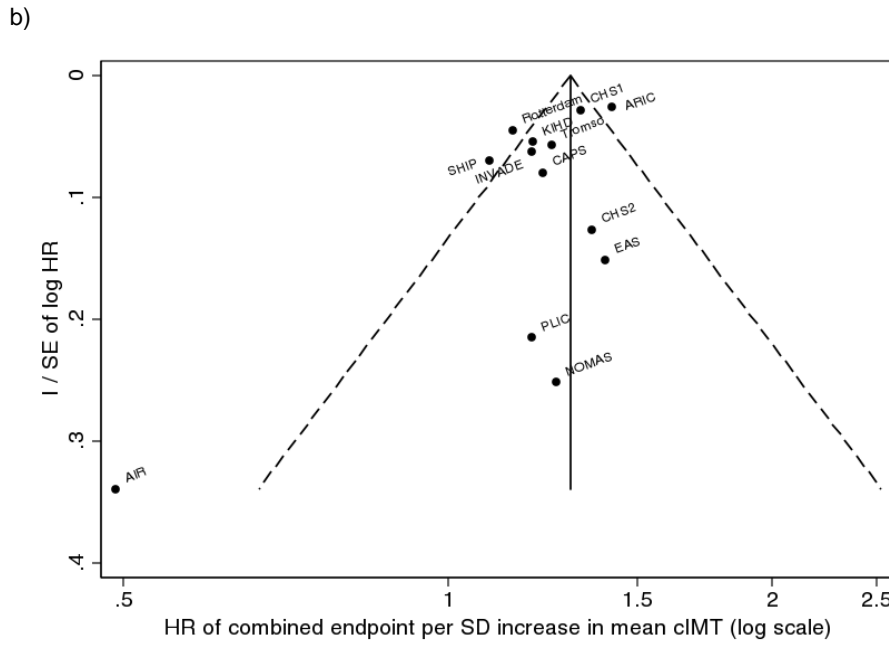

**Webfigure A4: Funnel plots of the hazard ratio of the combined endpoint per one SD increase in mean common carotid artery intima media thickness progression or mean CCA-IMT**

Results are adjusted for age, sex and mean IMT (model 2, see text), The weight (vertical axis) is the reciprocal of the standard error of the logHR. The dashed lines are pseudo 95% confidence limits.

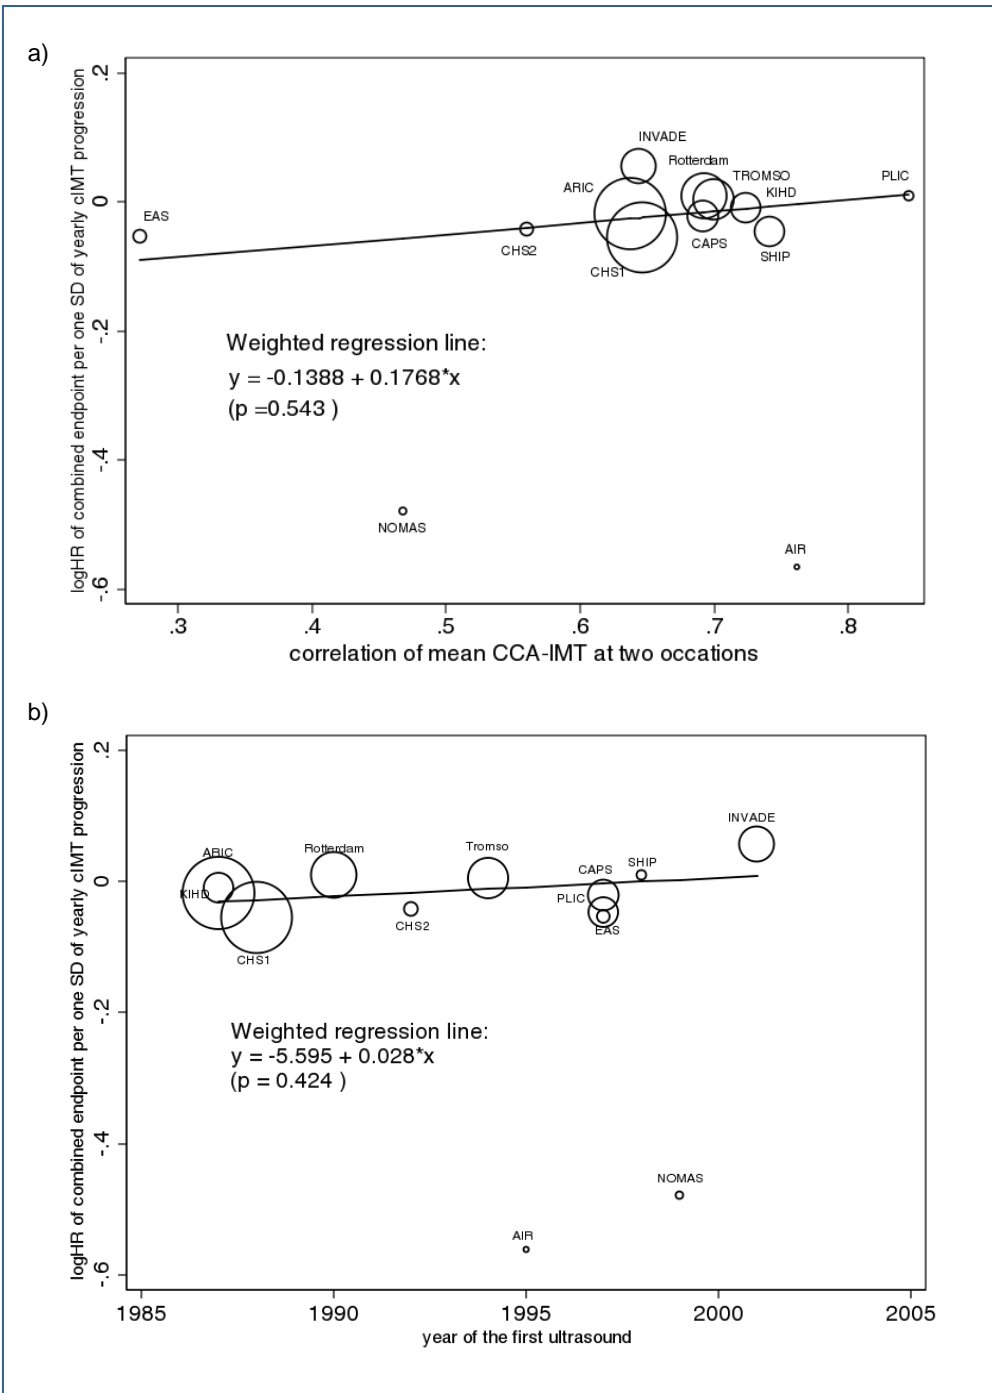

**Webfigure A5: Meta-regression of the log hazard ratio of the combined outcome per one SD increase in mean CCA-IMT progression vs. a) the reproducibility (correlation of repeated measures) of mean CCA-IMT by study and b) the year of the first ultrasound scan by study**

Hazard ratios are adjusted for vascular risk factors (model 4, see text). The size of the circles is inversely proportional to the variance of the log HR.

## Full list of members of the PROG-IMT Study Group and their affiliations

Stefan Agewall, MD, PhD, Prof.  
Department of Cardiology  
Oslo University Hospital Ullevål  
Oslo, Norway

Tadao Akizawa, MD, Prof.  
Division of Nephrology, Department of Medicine,  
Showa University School of Medicine, Tokyo, Japan

Mayuko Amaha, MD  
Division of Nephrology  
Department of Internal Medicine  
Shinmatsudo Central General Hospital  
Chiba, Japan

Sigmund A. Anderssen, PhD, Prof.  
Norwegian School of Sports Sciences  
Oslo, Norway

Folkert W. Asselbergs, MD, PhD, Assoc. Prof.  
Department of Cardiology  
Division Heart and Lungs  
University Medical Center Utrecht  
Utrecht, Netherlands

Damiano Baldassarre, PhD, Prof.  
Department of Pharmacological Sciences  
University of Milan  
Milan, Italy  
and  
Monzino Cardiology Center  
IRCCS  
Milan, Italy

Edith Beishuizen, PhD  
Department of General Internal Medicine, Leiden  
University Medical Center  
Leiden, the Netherlands

Oscar Beloqui, MD, PhD  
Department of Internal Medicine of the University Clinic  
of Navarra,  
Navarra, Spain

Gerald S. Berenson, MD, Prof.  
Dept. of Medicine, Pediatrics, Biochemistry,  
Epidemiology  
Tulane University School of Medicine and School of  
Public Health and Tropical Medicine  
New Orleans, USA

Horst Bickel, MD, PhD  
Department of Psychiatry  
University Hospital of the  
Technical University of Munich  
Munich, Germany

Stefan Blankenberg, MD, Prof.  
2nd Department of Medicine  
Johannes-Gutenberg University  
Mainz, Germany  
and  
Department of General and Interventional Cardiology  
University Medical Center Hamburg-Eppendorf  
Hamburg, Germany

Lena Bokemark, MD, PhD  
Wallenberg Laboratory for Cardiovascular Research  
University of Gothenburg  
Gothenburg, Sweden

Michiel L. Bots, MD, PhD, Prof.  
Julius Center for Health Sciences and Primary Care  
University Medical Center Utrecht, Netherlands  
and  
Department of Epidemiology and Biostatistics  
Erasmus Medical Center  
Rotterdam, Netherlands

Monique Breteler, MD, PhD, Prof.  
Department of Epidemiology  
Erasmus Medical Center  
Rotterdam, Netherlands  
and  
German Center for Neurodegenerative diseases  
(DZNE)  
Bonn, Germany

Frank P.J. Brouwers, MD  
Department of Cardiology  
University Medical Center Groningen  
Groningen, Netherlands

Alberico L. Catapano, PhD, Prof.  
Department of Pharmacological Sciences  
University of Milan  
and  
IRCSS Multimedica Sesto S Giovanni,  
Milan, Italy

Maria Chalkia, MD  
Department of Radiology  
Hippokraton General Hospital  
Thessaloniki, Greece

Kuo-Liong Chien, MD, Prof  
Institute of Epidemiology, Preventive Medicine  
College of Public Health  
National Taiwan University  
Taipei, Taiwan

Pronabesh DasMahapatra, MD, MPH  
Center for Cardiovascular Health  
Department of Epidemiology  
Tulane University School of Public Health and Tropical  
Medicine  
New Orleans, USA

Eric de Groot, MD, PhD  
Vascular Medicine  
Academic Medical Centre, F4-159-2  
Amsterdam, Netherlands

Jacqueline M. Dekker, PhD, Prof.  
Department of Epidemiology and Biostatistics and the  
EMGO Institute for Health and Care Research  
VU University Medical Center,  
Amsterdam, Netherlands

Moise Desvarieux, MD, PhD, Assoc. Prof.  
Department of Epidemiology  
Mailman School of Public Health  
Columbia University  
New York, USA  
and  
Chair in Chronic Disease,  
École des Hautes Études en Santé Publique,  
Paris, France  
and  
Research Director,  
INSERM U 738  
Paris, France

Chrysostomos Dimitriadis, MD  
University Department of Nephrology  
Hippokraton General Hospital  
Thessaloniki, Greece

Marcus Dörr, MD, PD  
Department B of Internal Medicine B/ Cardiology  
Greifswald University Clinic  
Greifswald, Germany

Pierre Ducimetière, PhD.  
Univ. Paris Sud-XI  
Kremlin-Bicêtre, France

Jean Philippe Empana, MD, PhD  
INSERM, U970 – Univ. Paris Descartes  
Paris, France

Gunnar Engström, MD, PhD, Assoc. Prof.  
Department of Clinical Sciences  
Malmö University Hospital  
Lund University  
Malmö, Sweden

Mark A. Espeland, PhD, Prof.  
Department of Public Health Science  
Wake Forest School of Medicine  
Winston-Salem, USA

Christine Espinola-Klein, MD, Prof.  
2<sup>nd</sup> Department of Medicine  
Johannes-Gutenberg University  
Mainz, Germany

Ramon Estruch, MD, PhD  
Endocrinology & Nutrition Service  
Hospital Clinic of Barcelona  
Barcelona, Spain

Björn Fagerberg, MD, PhD, Prof.  
Wallenberg Laboratory for Cardiovascular Research  
University of Gothenburg  
Gothenburg, Sweden

Gerry Fowkes, MBChB, PhD, Prof.  
Centre for Population Health Sciences  
University of Edinburgh  
Edinburgh, UK

Beat Frauchiger, MD, Prof.  
Department of Internal Medicine  
Division of Angiology  
Kantonsspital Frauenfeld  
Frauenfeld, Switzerland

Lu Gao  
MRC Biostatistics Unit  
Cambridge, UK

Liliana Grigore, MD, PhD  
SISA Center for the Study of Atherosclerosis  
Bassini Hospital  
Cinisello Balsamo, Italy  
and  
IRCCS Multimedica Sesto S Giovanni,  
Milan, Italy

Apostolos Hatzitolios, MD, PhD, Prof.  
1<sup>st</sup> Propedeutic Department of Internal Medicine  
Aristotle's University of Thessaloniki  
Thessaloniki, Greece

Bo Hedblad, MD, PhD, Prof.  
Department of Clinical Sciences in Malmö  
Epidemiological Research Group  
Malmö University Hospital  
Lund University  
Malmö, Sweden

Albert Hofman, Prof.  
Department of Epidemiology  
Erasmus Medical Center  
Rotterdam  
Netherlands

and  
Department of Epidemiology  
677 Huntington Avenue  
Kresge Building 9th Floor  
Boston, MA 02155

Ingar M. K. Holme, PhD, Prof.  
Norwegian School of Sports Sciences  
Oslo, Norway



Hirokazu Honda, MD, PhD  
Division of Nephrology, Department of Medicine,  
Showa University School of Medicine  
Tokyo, Japan

Manuel Landecho, MD, PhD  
Department of Internal Medicine of the University Clinic  
of Navarra,  
Navarra, Spain

George Ntaios, MD, PhD  
Department of Medicine  
University of Thessaly  
Larissa, Greece

Menno Huisman, MD  
Department of General Internal Medicine, Leiden  
University Medical Center  
Leiden, the Netherlands

Tatjana Lazarević, MA  
Medical faculty  
University of Priština,  
Priština/Kosovska Mitrovica, Serbia

Shuheji Okazaki, MD  
Department of Neurology  
Osaka University Graduate School of Medicine  
Osaka, Japan

Joseph Hung, MBBS (hons) Prof  
School of Medicine and Pharmacology, University of  
Western Australia  
and  
Department of Cardiovascular Medicine, Sir Charles  
Gairdner Hospital,  
Nedlands, WA, Australia

Hung-Ju Lin, MD  
Department of Internal Medicine  
National Taiwan University Hospital  
Taipei, Taiwan

Michael Hecht Olsen, MD, PhD, Prof,  
Hypertension Clinic  
Department of Endocrinology  
Odense University Hospital  
Odense, Denmark

Bernhard Iglseder, MD, Prof.  
Department of Geriatrics  
Parcelsus Medical University  
and  
Gemeinnützige Salzburger Landeskliniken  
Betriebsgesellschaft mbH  
Christian-Doppler-Klinik  
Salzburg, Austria

Lars Lind, MD, PhD; Prof.  
Department of Medicine  
Uppsala University  
Uppsala, Sweden

Sarif Pasha, MD, PhD  
Department of General Internal Medicine, Leiden  
University Medical Center  
Leiden, the Netherlands

Matthias W. Lorenz, MD, PD  
Department of Neurology  
University Medical Center  
J. W.Goethe-University  
Frankfurt am Main, Germany

Aikaterini Papagianni, MD, Assoc. Prof.  
University Department of Nephrology  
Hippokraton General Hospital  
Thessaloniki, Greece

Stein Harald Johnsen, MD, Assoc. Prof.  
Department of Neurology and Neurophysiology  
University Hospital of Northern Norway  
Tromsø, Norway  
and  
Department of Clinical Medicine  
University of Tromsø  
Tromsø, Norway

Francesca Mallamaci, MD  
Institute of Biomedicine (CNR)  
Clinical Epidemiology and Physiopathology of Renal  
Diseases and Hypertension  
Reggio Calabria, Italy

Anja Pflug, Dipl. Biology  
Department of Neurology  
University Medical Center  
J. W.Goethe-University  
Frankfurt am Main, Germany

Aleksandar Jovanović, MD, PhD, Prof.  
Medical faculty  
University of Priština,  
Priština/Kosovska Mitrovica, Serbia

Ellisiv Mathiesen, MD, Prof.  
Department of Clinical Medicine  
University of Tromsø  
Tromsø, Norway  
and  
Department of Neurology and Neurophysiology  
University Hospital of Northern Norway  
Tromsø, Norway

Matthieu Plichart, MD, MSc  
INSERM, U970 – Univ. Paris Descartes  
Paris, France  
and  
Gerontology Department  
Broca Hospital  
Paris, France

Michal Juraska, DSc  
Department of Biostatistics  
University of Washington  
Seattle, USA

Barry McGrath, MBBS, MD, Prof.  
Department of Vascular Sciences  
Monash University  
Melbourne, Australia  
and  
Dandenong Hospital  
Melbourne, Australia

Joseph F. Polak, MD, Prof., MPH  
Tufts University School of Medicine  
Tufts Medical Center  
Boston, USA

Anna Kablak-Ziembicka, MD, PhD, Assoc. Prof.  
Department of Cardiac and Vascular Diseases  
Institute of Cardiology  
Collegium Medicum Jagiellonian University  
Krakow, Poland

John McNeil, MBBS, PhD, Prof.  
School of Public Health and Preventive Medicine  
Monash University  
Melbourne, Australia

Holger Poppert, MD, PhD  
Department of Neurology  
University Hospital of the  
Technical University of Munich  
Munich, Germany

Jussi Kauhanen, MD, PhD, Prof.  
Institute of Public Health and Clinical Nutrition  
University of Eastern Finland  
Kuopio Campus  
Kuopio, Finland

Brendan M McQuillan, MBBS, PhD, Assoc. Prof  
School of Medicine and Pharmacology, University of  
Western Australia  
and  
Department of Cardiovascular Medicine, Sir Charles  
Gairdner Hospital,  
Nedlands, WA, Australia

Jackie Price, MD  
Centre for Population Health Sciences  
University of Edinburgh  
Edinburgh, UK

Maryam Kavousi, MD, MSc  
Department of Epidemiology  
Erasmus Medical Center  
Rotterdam  
Netherlands

Tsukasa Nakamura, MD, PhD  
Division of Nephrology  
Department of Internal Medicine  
Shinmatsudo Central General Hospital  
Chiba, Japan

Tadeusz Przewlocki, MD, PhD, Prof.  
Department of Cardiac and Vascular Diseases  
Institute of Cardiology  
Collegium Medicum Jagiellonian University  
Krakow, Poland

Masanori Kawasaki, MD, PhD, Assoc. Prof.  
Department of Cardiology  
Gifu University Graduate School of Medicine  
Gifu, Japan

Giel Nijpels, MD, PhD, Prof.  
Department of General Practice  
and  
The EMGO Institute for Health and Care Research  
VU University Medical Center,  
Amsterdam, Netherlands

Christine M. Robertson, MBChB  
Centre for Population Health Sciences  
University of Edinburgh  
Edinburgh, UK

Stefan Kiechl, MD, Prof.  
Department of Neurology  
Medical University Innsbruck  
Innsbruck, Austria

Giuseppe D. Norata, MD, PhD  
Department of Pharmacological Sciences  
University of Milan,  
and  
SISA Center for the Study of Atherosclerosis, Bassini  
Hospital,  
Cinisello Balsamo, Italy

Kimmo Ronkainen, MSc  
Institute of Public Health and Clinical Nutrition  
University of Eastern Finland  
Kuopio Campus  
Kuopio, Finland

Kazuo Kitagawa, MD, Assoc. Prof.  
Department of Neurology  
Osaka University Graduate School of Medicine  
Osaka, Japan

Emilio Ros, MD, PhD  
Endocrinology & Nutrition Service  
Hospital Clinic of Barcelona  
Barcelona, Spain

Sverre E. Kjeldsen, MD, PhD, Prof.  
Department of Cardiology  
Ullevaal University Hospital  
Oslo, Norway

Maria Rosvall, MD, PhD, Assoc. Prof.  
Department of Community Medicine  
Malmö University Hospital  
Lund University  
Malmö, Sweden

Tatjana Rundek, MD, PhD, Prof.  
Department of Neurology  
Miller School of Medicine  
University of Miami  
Miami, USA

Ralph L. Sacco, MD, MS, Prof.  
Department of Neurology  
Miller School of Medicine  
University of Miami  
Miami, USA

Dirk Sander, MD, Prof.  
Dept. of Neurology, Benedictus Hospital Tutzing &  
Feldafing  
Feldafing, Germany  
and  
Department of Neurology  
University Hospital of the  
Technical University of Munich  
Munich, Germany

Eiichi Sato, MD  
Division of Nephrology  
Department of Internal Medicine  
Shinmatsudo Central General Hospital  
Chiba, Japan

Christos Savopoulos, MD, PhD, Prof.  
1<sup>st</sup> Propedeutic Department of Internal Medicine  
Aristotles University of Thessalonik  
Thessaloniki, Greece

Caroline Schmidt, PhD  
Wallenberg Laboratory for Cardiovascular Research  
University of Gothenburg  
Gothenburg, Sweden

Ulf Schminke, MD, Prof.  
Department of Neurology  
Greifswald University Clinic  
Greifswald, Germany

Matthias Sitzer, MD, Prof.  
Department of Neurology  
Klinikum Herford  
Herford, Germany  
and  
Department of Neurology  
University Medical Center  
J. W. Goethe-University  
Frankfurt am Main, Germany

Sathanur R. Srinivasan, PhD, Prof.  
Department of Epidemiology, Biochemistry  
Tulane University School of Public Health and Tropical  
Medicine  
New Orleans, USA

Daniel Staub, MD, PD  
Department of Angiology  
University Hospital Basel  
Basel, Switzerland

Helmuth Steinmetz, MD, Prof.  
Department of Neurology  
University Medical Center  
J. W. Goethe-University  
Frankfurt am Main, Germany

Coen D.A. Stehouwer, MD, PhD, FESC, Prof.  
Department of Internal Medicine  
Maastricht University Medical Centre  
Maastricht, Netherlands  
and  
Cardiovascular Research Institute Maastricht (CARIM)  
Maastricht University Medical Centre  
Maastricht, Netherlands

Eva Stensland, MD, Assoc. Prof.  
Department of Clinical Medicine  
University of Tromsø  
Tromsø, Norway

Radjica Stolić, MD, PhD, Prof.  
Medical faculty  
University of Priština,  
Priština/Kosovska Mitrovica, Serbia

Ta-Chen Su, MD  
Department of Internal Medicine  
National Taiwan University Hospital  
Taipei, Taiwan

Peter L. Thompson, MD, MBA, Prof.  
Heart Research Institute of WA  
Nedlands, WA, Australia  
and  
Department of Cardiovascular Medicine  
Sir Charles Gairdner Hospital,  
Nedlands, WA, Australia

Simon G. Thompson, DSc, Prof.  
MRC Biostatistics Unit  
Institute of Public Health  
Cambridge, UK

Estefania Toledo, PhD  
Department of Preventive Medicine and Public Health  
School of Medicine  
University of Navarra  
Pamplona, Spain

Elena Tremoli, PhD, Prof.  
Department of Pharmacological Sciences  
University of Milan  
Milan, Italy  
and  
Mozino Cardiology Center  
IRCCS  
Milan, Italy

Giovanni Tripepi, MSc  
Institute of Biomedicine (CNR)  
Clinical Epidemiology and Physiopathology of Renal  
Diseases and Hypertension  
Reggio Calabria, Italy

Tomi-Pekka Tuomainen, MD, PhD, Prof.  
Institute of Public Health and Clinical Nutrition  
University of Eastern Finland  
Kuopio Campus  
Kuopio, Finland

Heiko Uthoff, MD  
Department of Angiology  
University Hospital Basel  
Basel, Switzerland

Wiek H. van Gilst, PhD, Prof.  
Department of Experimental Cardiology  
University Medical Center Groningen  
Groningen, Netherlands

Fabrizio Veglia, PhD  
Monzino Cardiology Center  
IRCCS  
Milan, Italy

Henry Völzke, MD, Prof.  
Institute for Community Medicine  
SHIP/Clinical-Epidemiological Research  
Greifswald, Germany

Kristian Wachtell, MD, PhD  
Department of Cardiology  
Gentofte University Hospital  
Copenhagen, Denmark

Johann Willeit, MD, Prof.  
Department of Neurology  
Medical University Innsbruck  
Innsbruck, Austria

Jacqueline Witteman, MD, Prof.  
Department of Epidemiology  
Erasmus Medical Center  
Rotterdam, Netherlands

Kiyofumi Yamada, MD, PhD  
Department of Neurosurgery  
Gifu University Graduate School of Medicine  
Gifu, Japan

David Yanez, PhD, Assoc. Prof.  
Department of Biostatistics  
University of Washington  
Seattle, USA

Assoc. Prof. Shinichi Yoshimura  
Department of Neurosurgery  
Gifu University Graduate School of Medicine  
Gifu, Japan

Kathrin Ziegelbauer, MSc, BSc  
Department of Neurology  
University Medical Center  
J. W. Goethe-University  
Frankfurt am Main, Germany

Carmine Zoccali, MD, Prof.  
Institute of Biomedicine (CNR)  
Clinical Epidemiology and Physiopathology of Renal  
Diseases and Hypertension  
Reggio Calabria, Italy

Sophia Zoungas, MBBS, Assoc. Prof.  
School of Public Health and Preventive Medicine  
Monash University  
Melbourne, Australia

Principal Investigator:  
Matthias W. Lorenz, MD PD  
Department of Neurology  
University Medical Center  
J. W. Goethe-University  
Frankfurt am Main, Germany

Statistical Advisor:  
Simon G. Thompson, DSc, Prof.  
MRC Biostatistics Unit  
Cambridge, UK

Project coordinator:  
Kathrin Ziegelbauer, MSc BSc  
Department of Neurology  
University Medical Center  
J. W. Goethe-University  
Frankfurt am Main, Germany
